# Supplementary material for: Green Space Exposure and Obesity in the Mexican Adult Population
Source: MDPI journal article supplement (doi:10.3390/ijerph192215072), 2022-11-16
Supplement: s1 [file s1]

**Table S1.** Characteristics socio-demographic of Mexican adults' population aged 20 to 59 participants in ENSANUT 2018-19, by quartiles of NDVI (buffer 1230m).

| Characteristic                                              | TOTAL         | NDVI (buffer 270m) |               |               |               |
|-------------------------------------------------------------|---------------|--------------------|---------------|---------------|---------------|
| <i>n</i> = 12,631***<br><i>N</i> = 59,710,238) ***          |               | Quartile 1         | Quartile 2    | Quartile 3    | Quartile 4    |
| NDVI                                                        |               |                    |               |               |               |
| Buffer 1230m (mean ± SD)                                    | 0.29 ± 0.0031 | 0.11 ± 0.0020      | 0.21 ± 0.0033 | 0.32 ± 0.0038 | 0.48 ± 0.0065 |
| Sex                                                         |               |                    |               |               |               |
| Male (%)                                                    | 42.2          | 42.11              | 42.71         | 41.75         | 42.15         |
| Female (%)                                                  | 57.8          | 57.89              | 57.29         | 58.25         | 57.85         |
| Age (years) (mean ± SD)                                     | 38.22 ± 0.19  | 39.14 ± 0.35       | 38.46 ± 0.40  | 37.41 ± 0.29  | 37.11 ± 0.38  |
| BMI (mean ± SD)*                                            | 28.87 ± 0.08  | 29.25 ± 0.17       | 28.73 ± 0.15  | 28.97 ± 0.16  | 28.29 ± 0.14  |
| Normal weight (BMI <25 kg/m²) (%)                           | 24.56         | 23.71              | 25.05         | 23.09         | 26.93         |
| Obesity (BMI ≥25 kg/m²) (%)                                 | 75.44         | 76.29              | 74.95         | 76.91         | 73.07         |
| Education level (%)                                         |               |                    |               |               |               |
| < High School                                               | 53.51         | 44.88              | 49.2          | 58.03         | 69.55         |
| High School Certificate                                     | 26.86         | 29.16              | 30.3          | 24.71         | 20.68         |
| > High School, Bachelor's degree or higher                  | 19.63         | 25.96              | 20.5          | 17.26         | 9.76          |
| Socioeconomic status (%)                                    |               |                    |               |               |               |
| 1 <sup>st</sup> tertile ( <i>low</i> )                      | 28.38         | 11.85              | 20.43         | 36.13         | 59.62         |
| 2 <sup>nd</sup> tertile ( <i>medium</i> )                   | 33.57         | 33.6               | 36.03         | 36.38         | 27.65         |
| 3 <sup>rd</sup> tertile ( <i>high</i> )                     | 38.04         | 54.56              | 43.54         | 27.49         | 12.73         |
| Region (%)                                                  |               |                    |               |               |               |
| Northeast                                                   | 20.21         | 43.08              | 16.12         | 3.68          | 1.61          |
| Central                                                     | 33.01         | 21.43              | 38.53         | 48.52         | 30.99         |
| Mexico City                                                 | 16.41         | 30.06              | 16.81         | 7.01          | 1.31          |
| South                                                       | 30.37         | 5.43               | 28.54         | 40.78         | 66.08         |
| Area (%)                                                    |               |                    |               |               |               |
| Urban                                                       | 78.95         | 97.59              | 89.41         | 72.56         | 39.54         |
| Rural                                                       | 21.05         | 2.41               | 10.59         | 27.44         | 60.46         |
| Physical activity moderate and vigorous, minutes/week** (%) |               |                    |               |               |               |
| <i>[n</i> = 10, 188 <i>N</i> =47,451,492] ***               |               |                    |               |               |               |
| Not Active <150 minutes                                     | 18.79         | 20.01              | 20.44         | 17.18         | 16.07         |
| Active >150 minutes                                         | 81.21         | 79.99              | 79.56         | 82.82         | 83.93         |

Abbreviations: NDVI= Normalized Difference Vegetation Index; BMI= Body Mass Index; SD= Standard Deviation. \* WHO classification. \*\* WHO guidelines on physical activity and sedentary behavior. \*\*\* *n*= sample size *N*= expanded sample. All *p*-value<0.05
